# Supplementary material
Source: MDPI journal article supplement (https://www.mdpi.com/2077-0472/11/9/831)

## Supplementary Data

**Table S1:** Isolation of *Fusarium oxysporum*

| Test sample | Media                | Organism        | CFU/ml        | On potato dextrose agar                                                             |
|-------------|----------------------|-----------------|---------------|-------------------------------------------------------------------------------------|
| 7 (ESI)     | Potato dextrose agar | <i>Fusarium</i> | 231           | 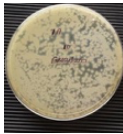 |
| 9 (ISI)     |                      |                 | Excess growth | 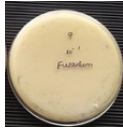 |

**Table S2:** Isolation of *Aspergillus niger*

| Test sample | Media                | Organism           | CFU/ml        | On potato dextrose agar                                                               |
|-------------|----------------------|--------------------|---------------|---------------------------------------------------------------------------------------|
| 7A (ESI)    | Potato dextrose agar | <i>Aspergillus</i> | Excess growth | 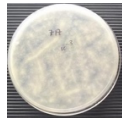 |
| 9 (ISI)     |                      |                    | Excess growth | 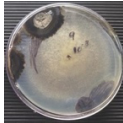 |

**Table S3: DNA Sequencing Information**

|                                             |
|---------------------------------------------|
| 1. Library Preparation and Sequencing       |
| 2. Sample Quality Control                   |
| 3. Library Construction and Quality Control |
| 4. Sequencing Results and Instructions      |
| 5. Data Quality Control                     |
| 6. Distribution of Sequencing               |
| 7. Quality Distribution of Sequencing       |
| 8. Error Rate Distribution of A/T/G/C Base  |

## 9. Results of Raw Data Filtering

## 10. Summary of Sequencing Data Information

- A. Library Preparation and Sequencing from the DNA samples to the final data, each step, including sample test, library preparation, and sequencing, influences the quality of the data, and data quality directly impacts the analysis results. To guarantee the reliability of the data, quality control (QC) is performed at each step of the procedure. The workflow is as follows:

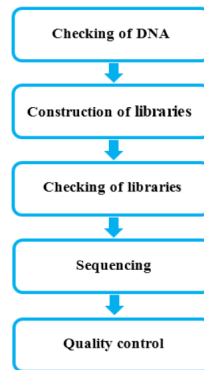

### B. Sample Quality Control

There are three main methods of QC for DNA samples:

- (1) Nanodrop: tests DNA purity (OD260/OD280).
- (2) Agarose Gel Electrophoresis: tests DNA degradation and potential contamination.
- (3) Qubit 2.0: quantifies the DNA concentration precisely.

2. Library Construction and Quality Control Qualified DNA is cut into fragments by restriction enzyme. The construction of the DNA libraries is through the processes of end repairing, adding A to tails, purification, PCR amplification and etc. Libraries were sequenced by Illumina high-throughput sequencer with paired-end sequencing strategy. The principle of library construction is as follows:

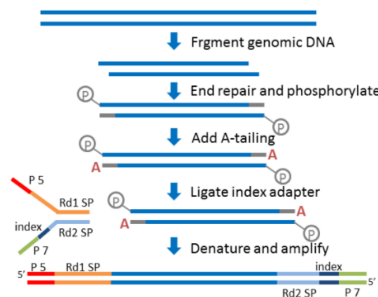

C. Sequencing The qualified libraries are fed into sequencers after pooling according to its effective concentration and expected data volume.

### Results and Instructions

#### Data Quality Control

Distribution of Sequencing Quality The “e” represents the sequence error rate and Qphred represents the base quality value,  $Q_{phred} = -10 \log_{10}(e)$ . The relationship between sequencing error rate (e) and sequencing base quality value (Qphred) is as below:

#### Data Quality Control

| Phred score | error base | right base | Q-score |
|-------------|------------|------------|---------|
| 10          | 1/10       | 90%        | Q10     |
| 20          | 1/100      | 99%        | Q20     |
| 30          | 1/1000     | 99.9%      | Q30     |
| 40          | 1/10000    | 99.99%     | Q40     |

The distribution of quality score (sample ISI):

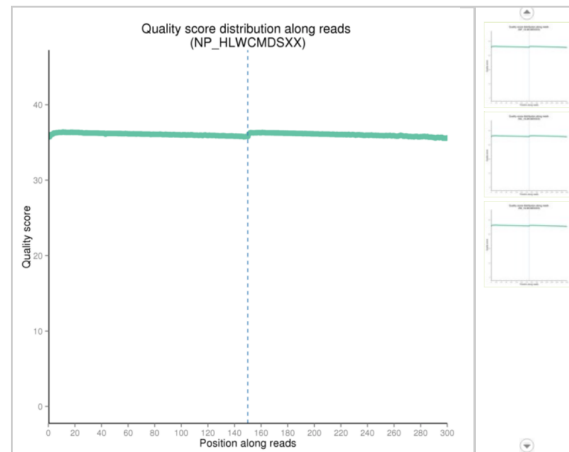

**Fig.1 Distribution of Sequencing Quality**

The base position is on the horizontal axis and the sequencing quality is on the vertical axis  
The first half part of the distribution is for reads1 and the latter half part is for reads2

Distribution of Sequencing Error Rate for Illumina SBS technology, the distribution of sequencing error rate has two features:

- (1) Error rate grows with sequenced reads extension because of the consumption of sequencing reagent.
- (2) The phenomenon is common in the Illumina high-throughput sequencing platform (Erlich Y. et al. 2008; Jiang et al. 2011).
- (3) The first several bases have higher sequencing error rate than others. At the beginning of sequencing, the focusing of the sequencer's fluorescence image sensor sensing element is not sensitive enough, thus, the quality of acquired fluorescence image is low. Generally, single base error rate should be lower than 1%.

The error rate of this project (sample ISI):

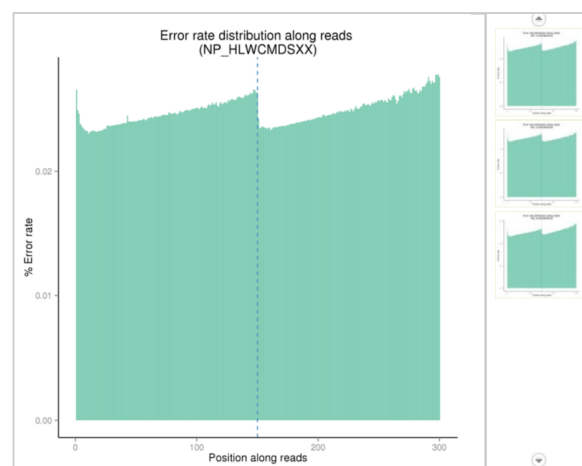

**Fig.2 Error Rate Distribution**

The base position is on the horizontal axis and the single base error rate is on the vertical axis  
The first half part of the distribution is for reads1 and the latter half part is for reads2

Distribution of A/T/G/C Base

It is used to identify the separation situation of AT and GC by checking the distribution of GC content. According to the principle of complementary bases, the content of AT and GC should be equal at each sequencing cycle and be constant and stable in the whole sequencing procedure. But in practical measurement, due to the primer amplification bias and some other reasons, the first 6 to 7 nucleotides will fluctuate which is normal and reasonable.

The distribution of GC content (sample ISI):

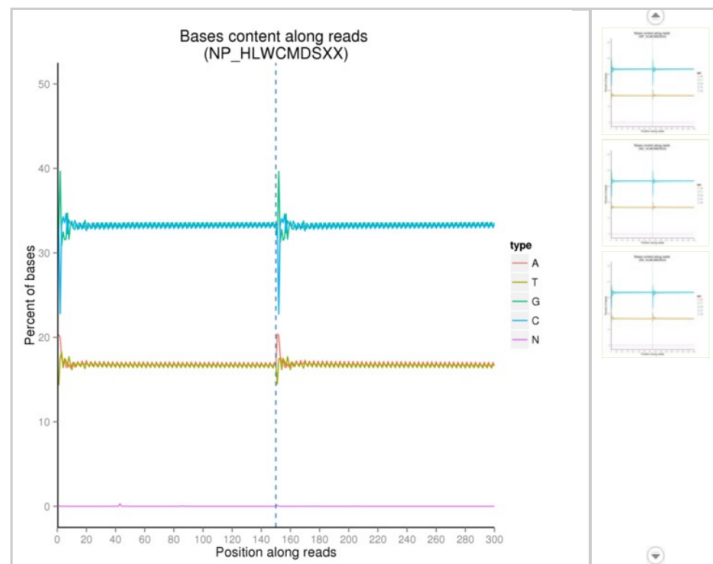

**Fig.3 A/T/G/C Distribution**

The base position is on the horizontal axis and the single base percentage is on the vertical axis

The first half part of the distribution is for reads1 and the latter half part is for reads2

**Results of Raw Data Filtering** The sequenced reads (raw reads) often contain low quality reads and adapters, which will affect the analysis quality. So it's necessary to filter the raw reads and get the clean reads. The filtering process is as follows:

- (1) Remove reads containing adapters.
- (2) Remove reads containing N > 10% (N represents the base cannot be determined).
- (3) Remove reads containing low quality (Qscore<= 5) base which is over 50% of the total base. Adapter sequences:

5' Adapter : 5'-AATGATACGGCGACCACCGAGATCTACACTCTTTCCCTACACGACGCTCTTCCGATCT-3'

3' Adapter (The underlined 6bp bases is Index)

5'-GATCGGAAGAGCACAGTCTGAACTCCAGTCACATCACGATCTCGTATGCCGTCTTCTGCTTG-3'

The Sequencing data filtration of this project can be seen in Fig.4 (Sample ISI):

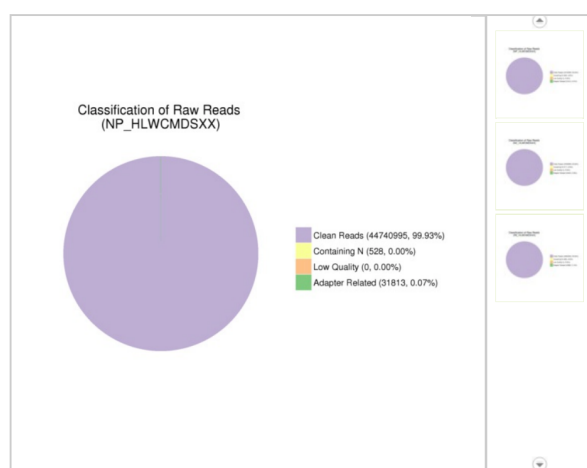

**Fig.4 Composition of Raw Data**

Different color for different components:

- (1)Adapter related: (reads containing adapter) / (total raw reads)
- (2)Containing N: (reads with more than 10% N) / (total raw reads)
- (3)Low quality: (reads of low quality) / (total raw reads)
- (4)Clean reads: (clean reads) / (total raw reads)

#### Summary of Sequencing Data Information

The total output of data on the sequencer: Raw data 40.1 G.

**Table S4: Data Quality Summary (R2 – ESI, NP – ISI and NC - ASI)**

The detail statistics for the quality of sequencing data.

| Sample | Library          | Flowcell/Lane | Raw reads | Raw data(G) | Effective(%) | Error(%) | Q20(%) | Q30(%) | GC(%) |
|--------|------------------|---------------|-----------|-------------|--------------|----------|--------|--------|-------|
| R2     | FDME190668638-1a | HLWCMSXX_L1   | 44869321  | 13.5        | 99.90        | 0.03     | 97.81  | 93.96  | 66.33 |
| NP     | FDME190668639-1a | HLWCMSXX_L1   | 44773336  | 13.4        | 99.93        | 0.03     | 98.00  | 94.41  | 66.43 |
| NC     | FDME190668640-1a | HLWCMSXX_L1   | 44063752  | 13.2        | 99.92        | 0.02     | 98.12  | 94.64  | 66.45 |

Sample: sample name

Raw reads: four rows are taken as a unit to calculate the total amount of read1 and read2 in raw data files

Raw bases: (total raw reads) \* (sequence length), calculating in G Error rate: base error rate

Q20, Q30: (Base count of Phred value > 20 or 30) / (Total base count) GC content: (G & C base count) / (Total base count)

**Table S5: Physicochemical and Microbial Analysis of the soil samples**

| Sample | pH   | EC<br>( $\mu\text{S}/\text{cm}$ ) | N<br>% | P<br>% | K<br>% | OC   | Cl | Fe<br>ppm | Cu<br>ppm | Mn<br>ppm | Zn<br>ppm | B<br>ppm | Microbial Count/g<br>Bacterial (cfu)<br>Fungal (cfu) |
|--------|------|-----------------------------------|--------|--------|--------|------|----|-----------|-----------|-----------|-----------|----------|------------------------------------------------------|
| ESI    | 7.73 | 135                               | 0.20   | 0.0084 | 0.011  | 0.92 | 15 | 0.98      | 26.9      | 9.5       | 24.8      | 3.4      | 1968<br>154                                          |
| ASI    | 6.35 | 139                               | 0.191  | 0.010  | 0.011  | 0.93 | 18 | 0.93      | 29.4      | 9.1       | 30.9      | 4.1      | 2240<br>170                                          |
| ISI    | 6.63 | 180                               | 0.20   | 0.011  | 0.014  | 0.97 | 21 | 0.98      | 31.4      | 9.6       | 33.2      | 4.3      | 2126<br>154                                          |

EC-Electrical Conductivity;

**Table S6:** Relative Abundance of Microbial species

| Table S9: Relative Abundance of Microbial Species |                 |     |        |        |                    |       |          |            |             |
|---------------------------------------------------|-----------------|-----|--------|--------|--------------------|-------|----------|------------|-------------|
| Species                                           | Parent Sequence |     |        |        | Relative Frequency |       | P-values |            | Effect size |
|                                                   |                 |     | Count  |        | %                  |       |          |            |             |
|                                                   | ESI             | ISI | ESI    | ISI    | ESI                | ISI   | PVal     | corrected  |             |
| <i>Achromobacter</i> sp. 2789STDY5608625          | 299             | 8   | 2975   | 588    | 10.05              | 1.36  | 5.90E-16 | 3.00E-12   | 8.69        |
| <i>Achromobacter</i> sp. K91                      | 236             | 4   | 2975   | 588    | 7.93               | 0.68  | 9.17E-15 | 3.62E-11   | 7.25        |
| <i>Achromobacter aegrifaciens</i>                 | 233             | 5   | 2975   | 588    | 7.83               | 0.85  | 1.33E-13 | 3.94E-10   | 6.98        |
| <i>Microbacterium</i> sp. SUBG005                 | 196             | 6   | 19463  | 13719  | 1.01               | 0.04  | 1.22E-37 | 2.17E-33   | 0.96        |
| <i>Agrobacterium larrymoorei</i>                  | 174             | 14  | 691    | 741    | 25.18              | 1.89  | 6.24E-44 | 2.22E-39   | 23.29       |
| <i>Curtobacterium</i> sp. MR_MD2014               | 153             | 6   | 2534   | 695    | 6.04               | 0.86  | 8.66E-11 | 1.62E-07   | 5.17        |
| <i>Pseudomonas</i> sp. T                          | 140             | 7   | 4318   | 3374   | 3.24               | 0.21  | 2.75E-27 | 1.63E-23   | 3.03        |
| <i>Moraxella osloensis</i>                        | 132             | 9   | 146    | 26     | 90.41              | 34.62 | 2.90E-09 | 4.69E-06   | 55.80       |
| <i>Rheinheimera</i> sp.                           | 113             | 1   | 329    | 54     | 34.35              | 1.85  | 2.55E-08 | 3.63E-05   | 32.49       |
| <i>Chryseobacterium arthrosphaerae</i>            | 111             | 2   | 689    | 230    | 16.11              | 0.87  | 6.00E-13 | 1.42E-09   | 15.24       |
| <i>Aspergillus arachidicola</i>                   | 55              | 16  | 5460   | 30850  | 1.01               | 0.05  | 1.12E-31 | 1.33E-27   | 0.96        |
| <i>Aspergillus candidus</i>                       | 50              | 16  | 5460   | 30850  | 0.92               | 0.05  | 4.06E-28 | 2.89E-24   | 0.86        |
| <i>Aspergillus campestris</i>                     | 48              | 11  | 5460   | 30850  | 0.88               | 0.04  | 1.32E-29 | 1.17E-25   | 0.84        |
| ISI vs ASI                                        | ISI             | ASI | ISI    | ASI    | ISI                | ASI   | PVal     | Corrected  | ES          |
| <i>Streptomyces</i> sp. FxanaC1                   | 89              | 18  | 268202 | 200210 | 0.03               | 0.01  | 9.95E-09 | 5.89E-05   | 0.02        |
| <i>Streptomyces</i> sp. F12                       | 63              | 9   | 268202 | 200210 | 0.02               | 0.00  | 2.74E-08 | 0.00012189 | 0.02        |
| <i>Rhizobium</i> sp. NFACC06-2                    | 27              | 2   | 6383   | 5120   | 0.42               | 0.04  | 1.07E-05 | 0.02533065 | 0.38        |
| <i>Nocardia</i> sp. Root136                       | 26              | 17  | 9801   | 27406  | 0.27               | 0.06  | 2.54E-06 | 0.00645715 | 0.20        |
| <i>Variovorax</i> sp. 369                         | 24              | 9   | 4257   | 7685   | 0.56               | 0.12  | 1.56E-05 | 0.03264587 | 0.45        |
| <i>Aspergillus nomius</i>                         | 24              | 18  | 30850  | 4648   | 0.08               | 0.39  | 1.88E-06 | 0.00514648 | -0.31       |

|                                   |    |     |        |        |      |      |          |            |       |
|-----------------------------------|----|-----|--------|--------|------|------|----------|------------|-------|
| <i>Aspergillus ochraceoroseus</i> | 20 | 15  | 30850  | 4648   | 0.06 | 0.32 | 1.35E-05 | 0.03006614 | -0.26 |
| <i>Mycobacterium</i> sp. DL90     | 18 | 51  | 43318  | 36512  | 0.04 | 0.14 | 1.87E-06 | 0.00553966 | -0.10 |
| <i>Pseudomonas</i> sp. LFM046     | 17 | 160 | 3374   | 5016   | 0.50 | 3.19 | 4.00E-20 | 1.42E-15   | -2.69 |
| <i>Streptomyces</i> sp. SN-593    | 16 | 52  | 268202 | 200210 | 0.01 | 0.03 | 1.60E-08 | 8.13E-05   | -0.02 |

**Table S7:** Pathway predictions

|                     | ASI      | ISI      | ESI      | Name                                                          | Pathway                                                                                                                                                                                                                                                                                                                                 |
|---------------------|----------|----------|----------|---------------------------------------------------------------|-----------------------------------------------------------------------------------------------------------------------------------------------------------------------------------------------------------------------------------------------------------------------------------------------------------------------------------------|
| <b>Unmapped</b>     | 66201187 | 63530411 | 67052468 |                                                               |                                                                                                                                                                                                                                                                                                                                         |
| <b>Unclassified</b> | 8120933  | 9418508  | 7584133  | Unclassified                                                  | Unclassified                                                                                                                                                                                                                                                                                                                            |
| <b>K03088</b>       | 103582   | 115430   | 90207    | RNA polymerase sigma-70 factor, ECF subfamily                 | Brite Hierarchies; Protein families: genetic information processing; Transcription machinery                                                                                                                                                                                                                                            |
| <b>K12132</b>       | 101294   | 107393   | 91587    | eukaryotic-like serine/threonine-protein kinase [EC:2.7.11.1] | Brite Hierarchies; Protein families: metabolism; Protein kinases                                                                                                                                                                                                                                                                        |
| <b>K01990</b>       | 72289    | 84001    | 73808    | ABC-2 type transport system ATP-binding protein               | Brite Hierarchies; Protein families: signaling and cellular processes; Transporters                                                                                                                                                                                                                                                     |
| <b>K00059</b>       | 62612    | 75406    | 69969    | 3-oxoacyl-[acyl-carrier protein] reductase [EC:1.1.1.100]     | Metabolism; Lipid metabolism; Fatty acid biosynthesis   Metabolism; Metabolism of cofactors and vitamins; Biotin metabolism   Metabolism; Biosynthesis of other secondary metabolites; Prodigiosin biosynthesis   Brite Hierarchies; Protein families: metabolism; Lipid biosynthesis proteins                                          |
| <b>K06994</b>       | 60365    | 63022    | 61404    | putative drug exporter of the RND superfamily                 | Not Included in Pathway or Brite; Poorly characterized; General function prediction only                                                                                                                                                                                                                                                |
| <b>K01992</b>       | 59730    | 68818    | 59492    | ABC-2 type transport system permease protein                  | Brite Hierarchies; Protein families: signaling and cellular processes; Transporters                                                                                                                                                                                                                                                     |
| <b>K00249</b>       | 58830    | 76269    | 74103    | acyl-CoA dehydrogenase [EC:1.3.8.7]                           | Metabolism; Carbohydrate metabolism; Propanoate metabolism   Metabolism; Lipid metabolism; Fatty acid degradation   Metabolism; Amino acid metabolism; Valine, leucine and isoleucine degradation   Metabolism; Metabolism of other amino acids; beta-Alanine metabolism   Organismal Systems; Endocrine system; PPAR signaling pathway |
| <b>K02035</b>       | 53373    | 80130    | 60833    | peptide/nickel transport system                               | Cellular Processes; Cellular community - prokaryotes; Quorum sensing   Brite Hierarchies; Protein                                                                                                                                                                                                                                       |

|  |                           |                                                          |
|--|---------------------------|----------------------------------------------------------|
|  | substrate-binding protein | families: signaling and cellular processes; Transporters |
|--|---------------------------|----------------------------------------------------------|

**Table S8:** PFAM Abundance Overview

|                                                                               | ASI      | ISI      | ESI      |
|-------------------------------------------------------------------------------|----------|----------|----------|
| Unmapped                                                                      | 66201187 | 63530411 | 67052468 |
| Unclassified                                                                  | 8836439  | 10084893 | 8234898  |
| PF00005 [ABC transporter]                                                     | 253554   | 318934   | 273226   |
| PF07690 [Major Facilitator Superfamily]                                       | 195590   | 263909   | 255603   |
| PF00528 [Binding-protein-dependent transport system inner membrane component] | 159904   | 226135   | 201665   |
| PF00501 [AMP-binding enzyme]                                                  | 114937   | 147778   | 135954   |
| PF00171 [Aldehyde dehydrogenase family]                                       | 104552   | 123499   | 120812   |
| PF00072 [Response regulator receiver domain]                                  | 82514    | 90451    | 80950    |
| PF00106 [short chain dehydrogenase]                                           | 64910    | 80596    | 74544    |

**Table S9:** Variant Analysis

*Fusarium oxysporum*  
Variants rate details

| Chromosome   | Length            | Variants  | Variants rate  |
|--------------|-------------------|-----------|----------------|
| NC_030986.1  | 6,854,980         | 12        | 571,248        |
| NC_030987.1  | 5,577,357         | 26        | 214,513        |
| NC_030989.1  | 5,212,762         | 7         | 744,680        |
| NC_030990.1  | 4,914,260         | 14        | 351,018        |
| NC_030992.1  | 4,347,182         | 7         | 621,026        |
| NC_030993.1  | 3,984,410         | 7         | 569,201        |
| NC_030994.1  | 3,304,701         | 4         | 826,175        |
| NC_030995.1  | 2,896,840         | 2         | 1,448,420      |
| NC_030996.1  | 2,337,134         | 2         | 1,168,567      |
| <b>Total</b> | <b>39,429,626</b> | <b>81</b> | <b>486,785</b> |

**Table S10:** Number variants by type

| Type         | Total     |
|--------------|-----------|
| SNP          | 81        |
| MNP          | 0         |
| INS          | 0         |
| DEL          | 0         |
| MIXED        | 0         |
| INV          | 0         |
| DUP          | 0         |
| BND          | 0         |
| INTERVAL     | 0         |
| <b>Total</b> | <b>81</b> |

Number of effects by impact

| Type (alphabetical order) | Count | Percent |
|---------------------------|-------|---------|
| LOW                       | 125   | 21.295% |
| MODERATE                  | 26    | 4.429%  |
| MODIFIER                  | 436   | 74.276% |

Number of effects by functional class

| Type (alphabetical order) | Count | Percent |
|---------------------------|-------|---------|
| MISSENSE                  | 26    | 17.219% |
| SILENT                    | 125   | 82.781% |

Missense / Silent ratio: 0.208

Number of effects by type and region

| Type                      |       |         | Region                    |       |         |
|---------------------------|-------|---------|---------------------------|-------|---------|
| Type (alphabetical order) | Count | Percent | Type (alphabetical order) | Count | Percent |
| DOWNSTREAM                | 230   | 39.182% | DOWNSTREAM                | 230   | 39.182% |
| EXON                      | 10    | 1.704%  | EXON                      | 161   | 27.428% |
| NON_SYNONYMOUS_CODING     | 26    | 4.429%  | UPSTREAM                  | 185   | 31.516% |
| SYNONYMOUS_CODING         | 125   | 21.295% | UTR_3_PRIME               | 11    | 1.874%  |
| UPSTREAM                  | 185   | 31.516% |                           |       |         |
| UTR_3_PRIME               | 11    | 1.874%  |                           |       |         |

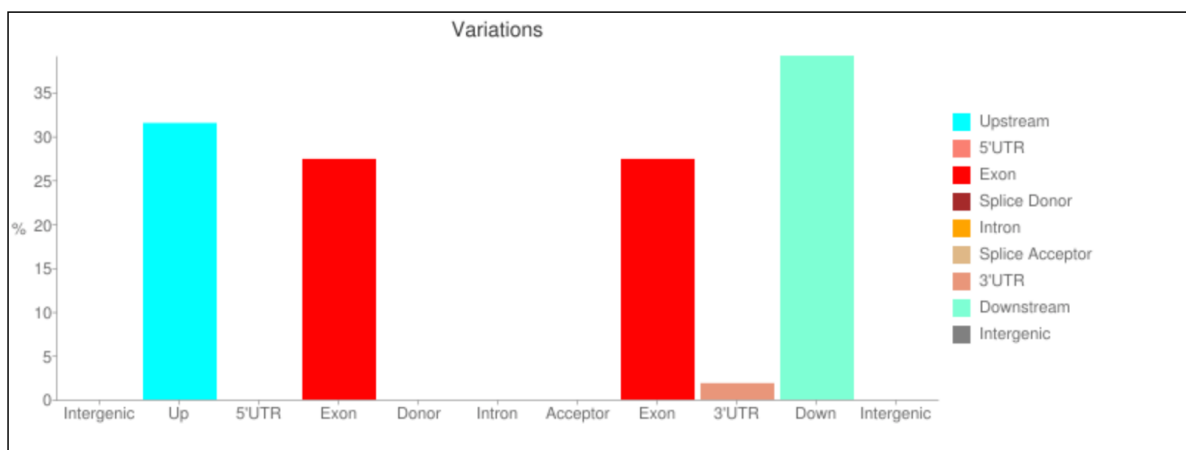

Base changes (SNPs)

|   | A | C | G  | T |
|---|---|---|----|---|
| A | 0 | 7 | 12 | 1 |

|   |   |    |   |   |
|---|---|----|---|---|
| C | 0 | 0  | 6 | 7 |
| G | 7 | 10 | 0 | 3 |
| T | 4 | 20 | 4 | 0 |

**Ts/Tv (transitions / transversions)**

**Note:** Only SNPs are used for this statistic.

**Note:** This Ts/Tv ratio is a 'raw' ratio (ratio of observed events).

|               |        |
|---------------|--------|
| Transitions   | 90     |
| Transversions | 70     |
| Ts/Tv ratio   | 1.2857 |

**All variants:**

Sample, Total

Transitions ,90,90

Transversions ,70,70

Ts/Tv ,1.286,1.286

### Supplementary figures

#### Figure S1.DNA Extraction

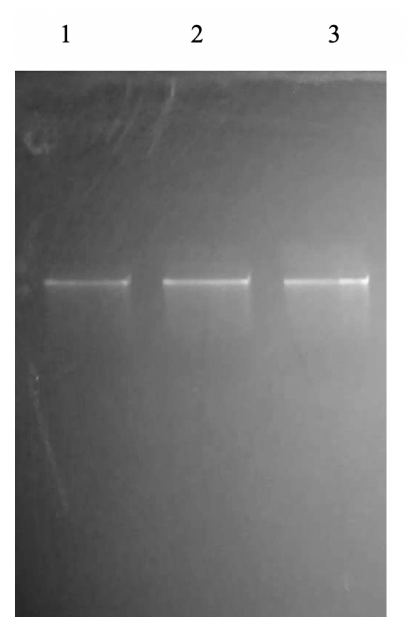

*Genomic DNA loaded on 1% Agarose gel*

#### Lane Description:

Lane 1: gDNA from ISI sample (2ul loaded)

Lane 1: gDNA from ASI sample (2ul loaded)

Lane 1: gDNA from ESI sample (2ul loaded)

**Figure S2:** Rarefaction curves from experimental data sets ESI, ISI and ASI

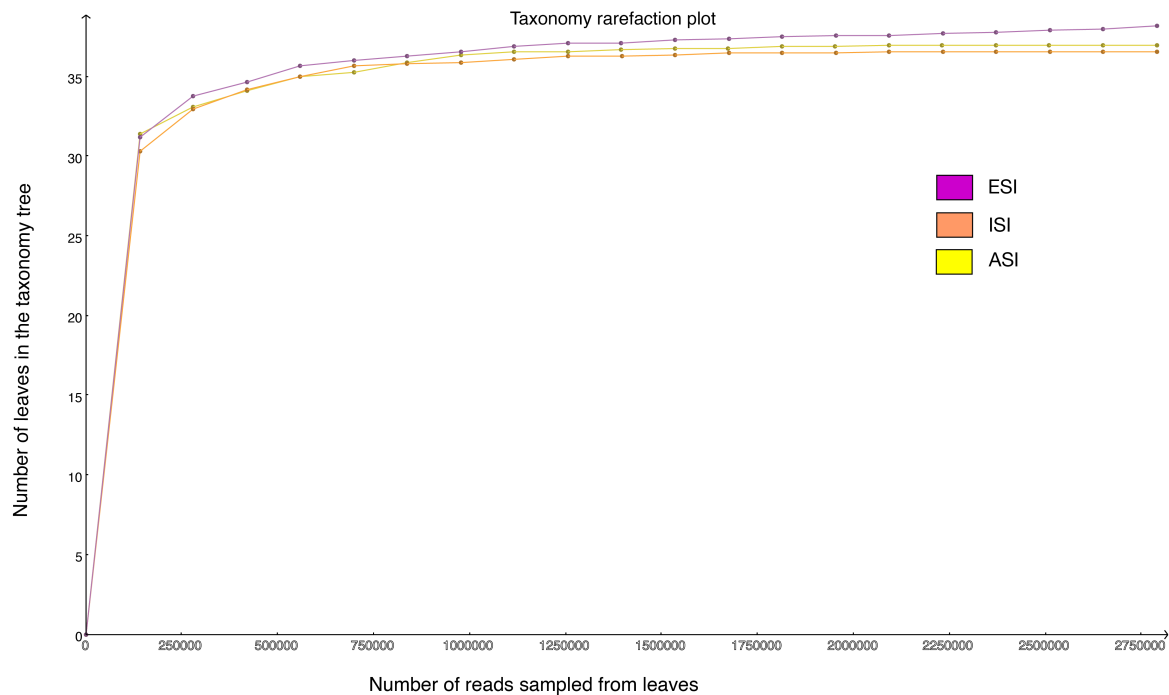

Figure S3: Pathway predictions

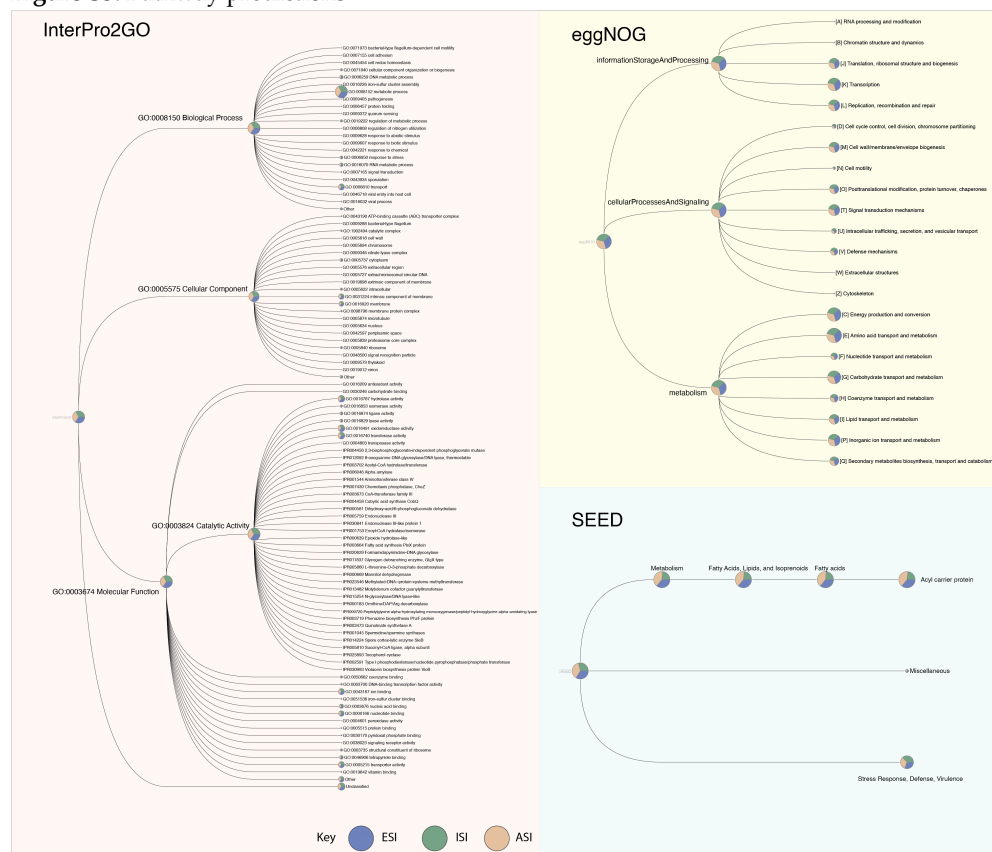

**Figure S4: KEGG Annotations**

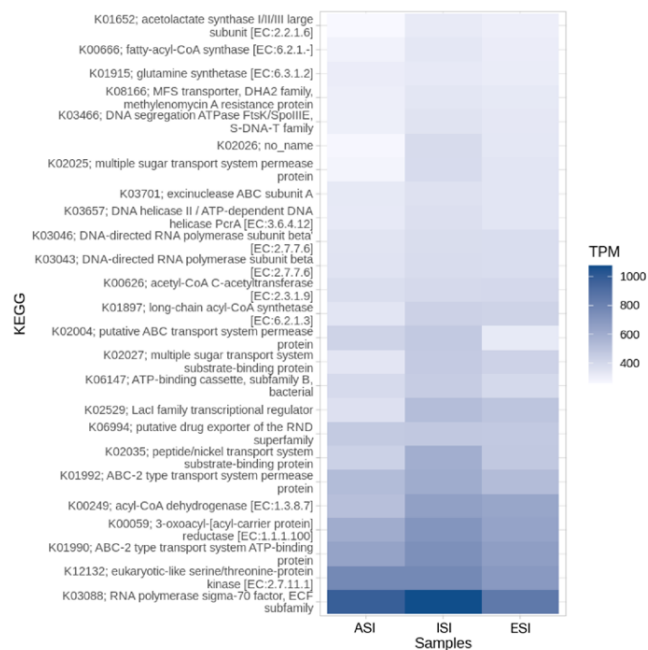

**Figure S5: COG Annotations**

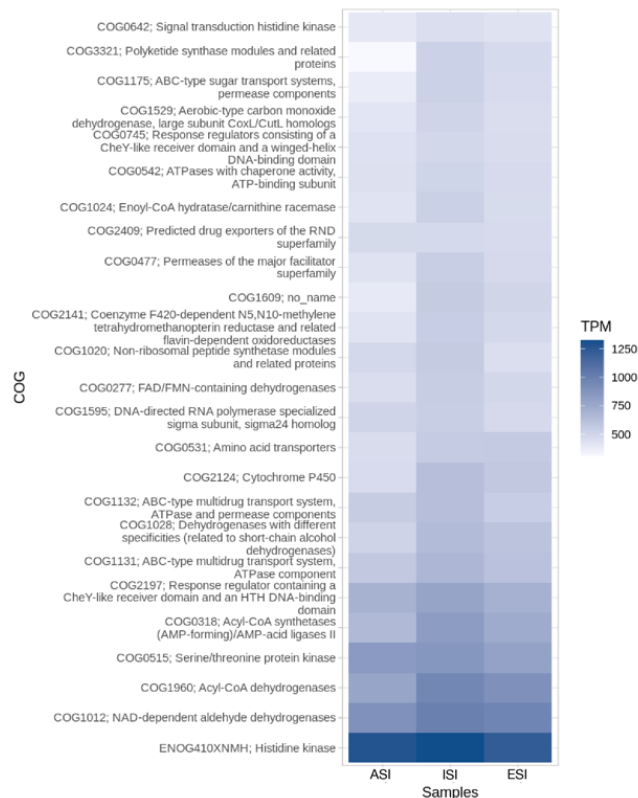

Figure S6: PFAM Annotations

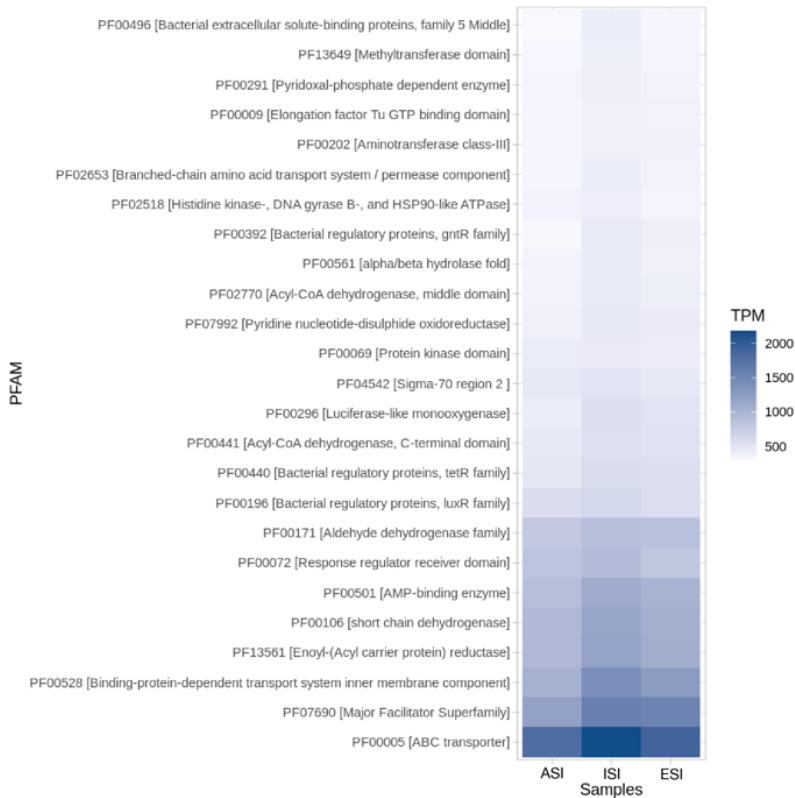

Supplement: s1 [file s1 › agriculture-1285800-supplementary.pdf]
